# Supplementary material
Source: Springer Nature journal article supplement (https://www.springermedizin.de/resource/supplementary/13012_2011_374_MOESM8_ESM.pdf/9629884)
Supplement: MOESM8 [file 9629884]

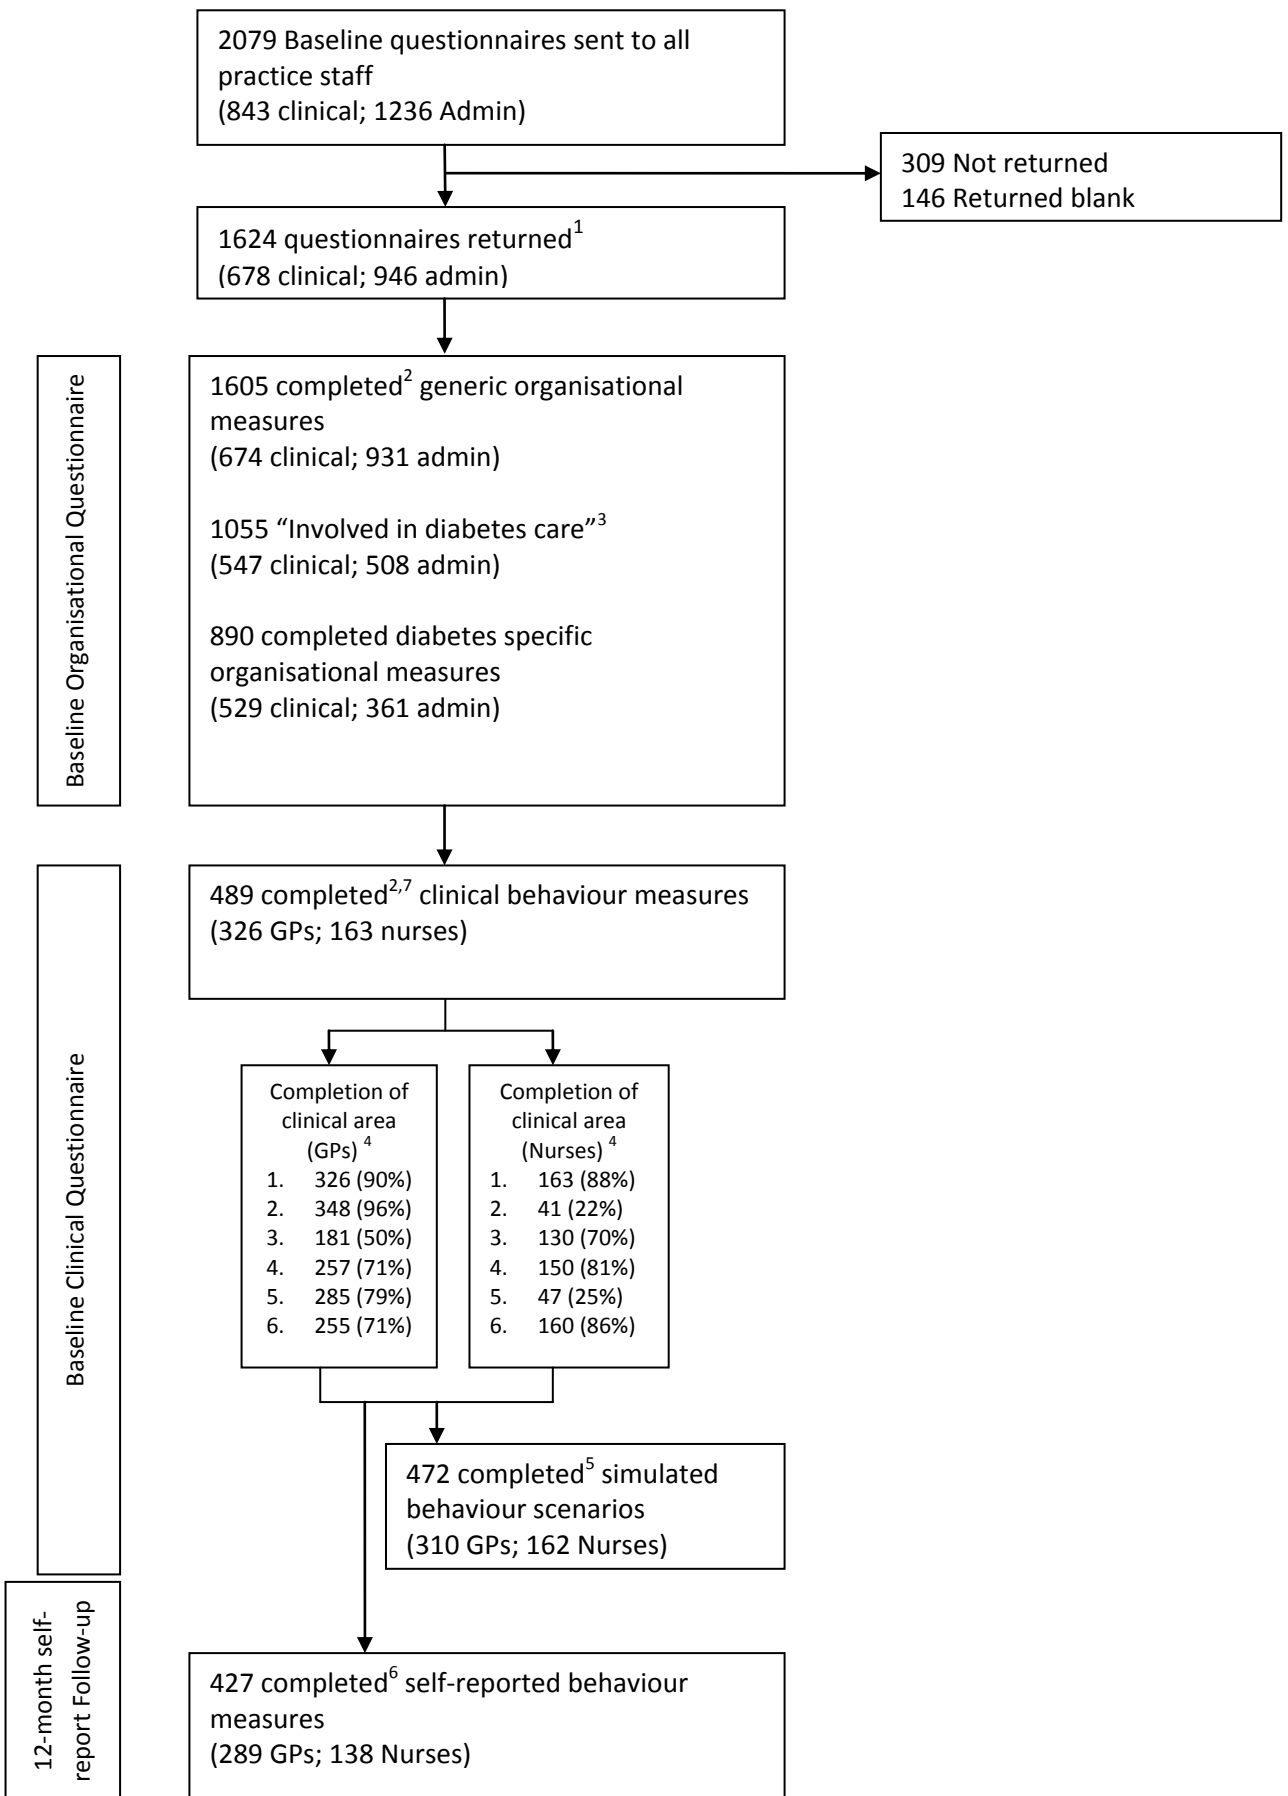

<sup>1</sup> returned = answered at least one item in the whole questionnaire  
<sup>2</sup> completed = data on all measures for at least one model/theory/outcome  
<sup>3</sup> explicitly stated that their role was providing diabetes care and/or responded to diabetes-specific measures  
<sup>4</sup> as percentage of those who responded 'yes' to whether they are involved in diabetes care  
<sup>5</sup> completed = responded to at least one clinical area on all scenarios  
<sup>6</sup> completed = responded to at least one self-reported measure at 12 months follow-up  
<sup>7</sup> highest combined completion (GPs and nurses) of a given clinical area
